# Supplementary material
Source: PubMed Central journal article supplement (PMC3593810)
Supplement: NIHMS410448-supplement-01.pdf [file NIHMS410448-supplement-01.pdf]

## Supplementary materials

**Supplementary Figure S1. MRM transitions and quantitative analysis of unmodified sequence counterparts of detected phosphopeptides detected in human heart mitochondrial samples.** The new set of MRM assays were validated using heavy-isotope-labeled synthetic peptide standards. The unmodified sequences of human protein phosphorylation were detected by comparing the heavy-labeled standard (H) and unlabeled endogenous peptides (L). The MRM signals for a panel of transitions are shown and labeled; asterisks next to the fragment ions denote neutral loss of  $H_3PO_4$ . **(A)** Pyruvate dehydrogenase E1 complex alpha subunit (PDHA1) unmodified peptide YHGHSMSDPGVS<sup>\*</sup>YR corresponding to the S293 and S300 sites. **(B)** Succinyl-CoA ligase [ADP-forming] subunit beta (SUCLA2) unmodified peptide INFDP<sup>\*</sup>SNSAYR corresponding to the S279 site. **(C)** Adenine nucleotide translocase 1 (ANT1) unmodified peptide AAYFGVYDTAK corresponding to the Y191 site. **(D)** ANT1 unmodified peptide DFLAGGVAAAVSK corresponding to the S22 site. **(E)** Branched-chain alpha-keto acid dehydrogenase subunit alpha (BCKDHA) unmodified peptide SVDEVNYW<sup>\*</sup>DK corresponding to the S344 site. **(F)** Voltage-dependent anion channel 1 (VDAC1) unmodified peptide LTFDSSFSPNTGK corresponding to the S114 site. **(G)** ANT1 unmodified peptide DFLAGGVAAAVSK corresponding to the T84 site. Amino acid residue numbering is based on mouse homolog sequence in Uniprot.

**Supplementary Figure S2. MRM transitions and quantitative analysis of unmodified sequence counterparts of undetected phosphopeptides in human heart mitochondrial samples.** Four of the 12 phosphopeptides corresponding to human protein sequences were below detection limit in the human heart samples analyzed. Their unmodified sequence counterparts were detected by comparing the heavy-labeled standard (H) and unlabeled endogenous peptides (L). **(A)** Adenine nucleotide translocase 4 (ANT4) unmodified peptide GTGGALV<sup>\*</sup>LVLYDK corresponding to the T293 site. **(B)** 2-Oxoglutarate dehydrogenase (OGDH) unmodified peptide GSLAAVAHAQSLVEAQPNV<sup>\*</sup>DK corresponding to the S103 site. **(C)** OGDH unmodified peptide VVNAPIFHVNSDDPEAVMYV<sup>\*</sup>CK corresponding to the Y485 site. **(D)** Fumarate hydratase (FH) unmodified peptide SGLGELILPENEPGSSIMPGK corresponding to the S363 site. Amino acid residue numbering is based on mouse homolog sequence in Uniprot.

**Figure S1**

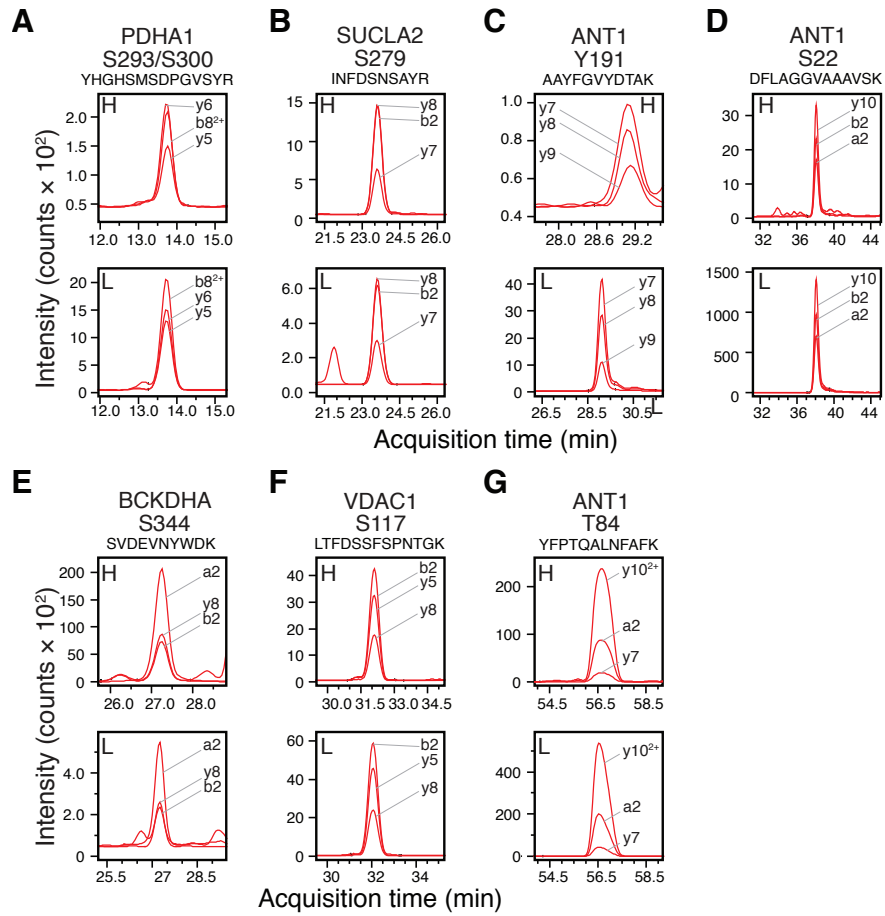

Supplementary Figure S1

Figure S2

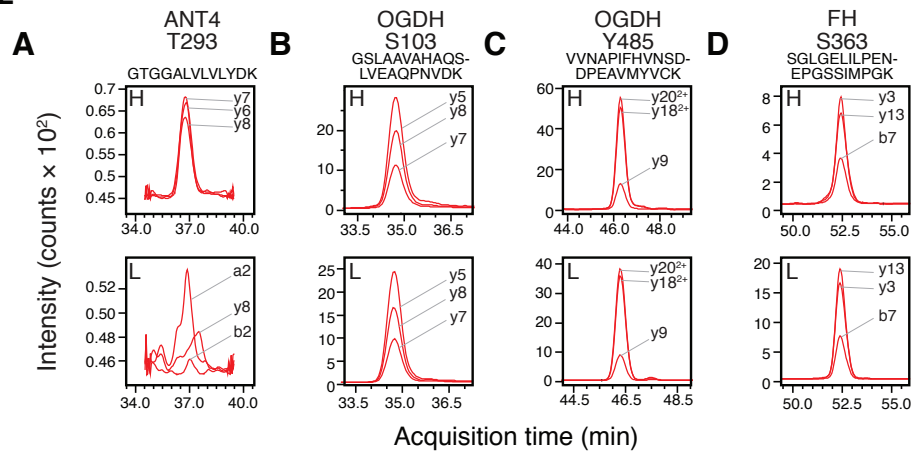

Supplementary Figure S2
